# Supplementary material for: The influences of historic lake trophy and mixing regime changes on long-term phosphorus fraction retention in sediments of deep eutrophic lakes: a case study from Lake Burgäschi, Switzerland
Source: Copernicus journal article supplement (doi:10.5194/bg-17-2715-2020), 2020-05-20
Supplement: Supplementary file 1 [file bg-17-2715-2020-supplement.pdf]

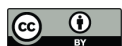

## *Supplement of*

# **The influences of historic lake trophy and mixing regime changes on long-term phosphorus fraction retention in sediments of deep eutrophic lakes: a case study from Lake Burgäschi, Switzerland**

**Luyao Tu et al.**

*Correspondence to:* Luyao Tu ([luyao.tu@giub.unibe.ch](mailto:luyao.tu@giub.unibe.ch))

The copyright of individual parts of the supplement might differ from the CC BY 4.0 License.

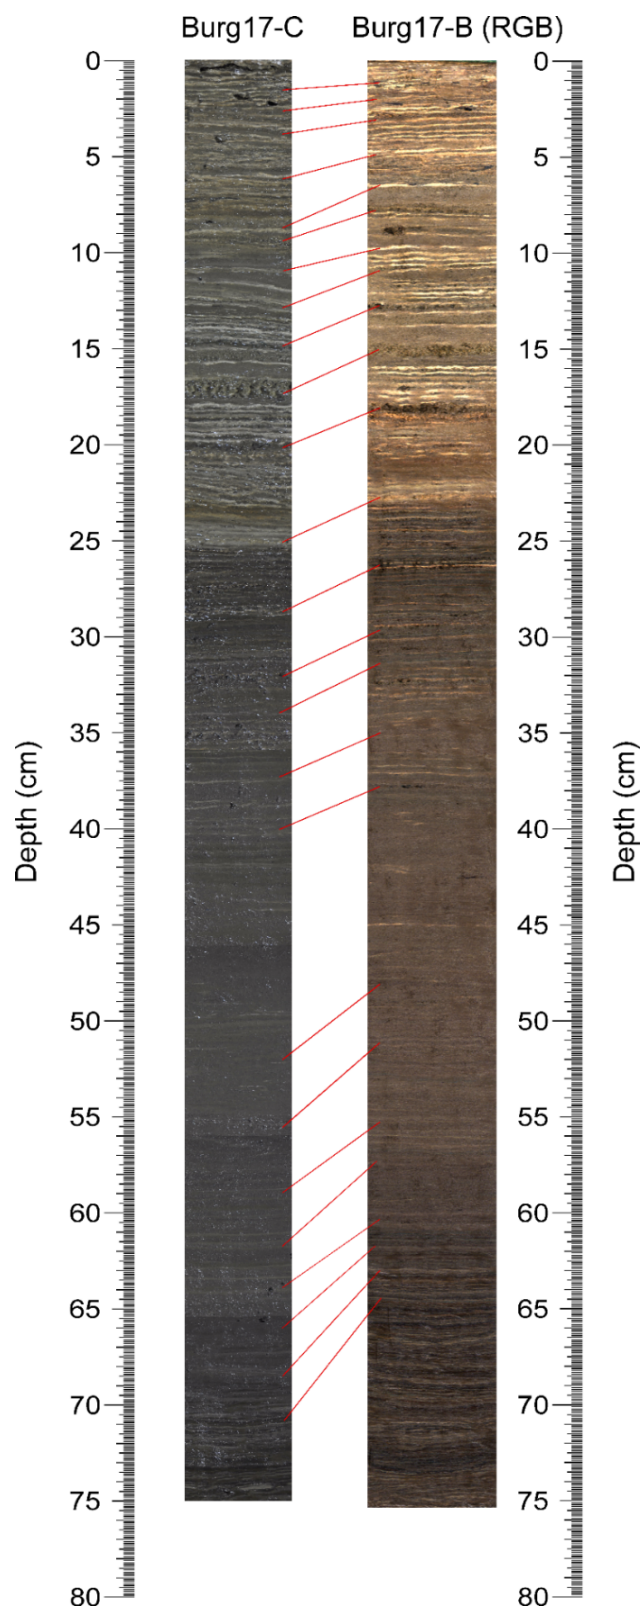

**Figure S1: Core correlation between Core Burg17-C and Core Burg17-B (the dated core) sediment images. The core picture of Burg17-B is a true colour RGB (R: 640 nm, G: 545 nm, B: 460 nm) linear-stretch image. The core picture of Burg17-C was taken with a Nikon D80 digital camera.**

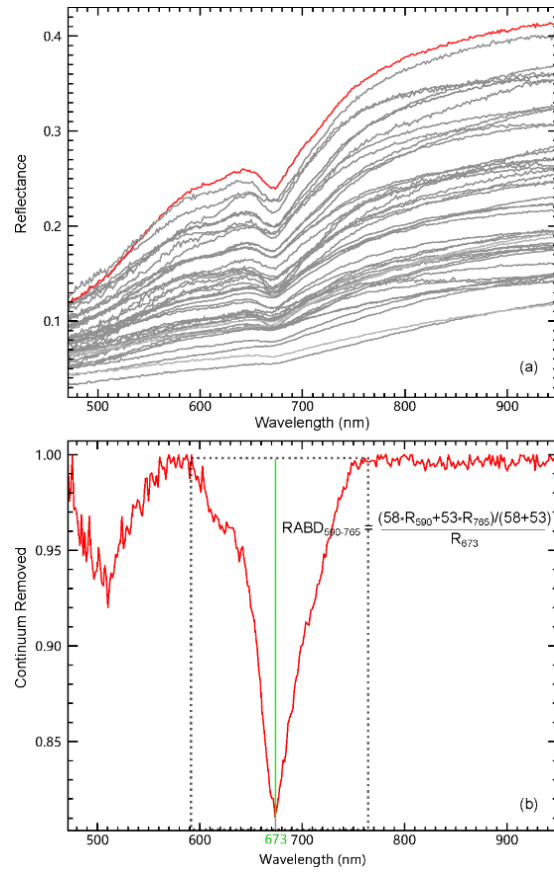

**Figure S2: (a) Spectral endmembers obtained from Spectral Hourglass Wizard. The highlighted red endmember spectrum #19 is used in (b). (b) Continuum removed spectrum of endmember #19, showing the formula for RABD<sub>590-765</sub> calculation for a trough minimum at  $R_{673}$ .**

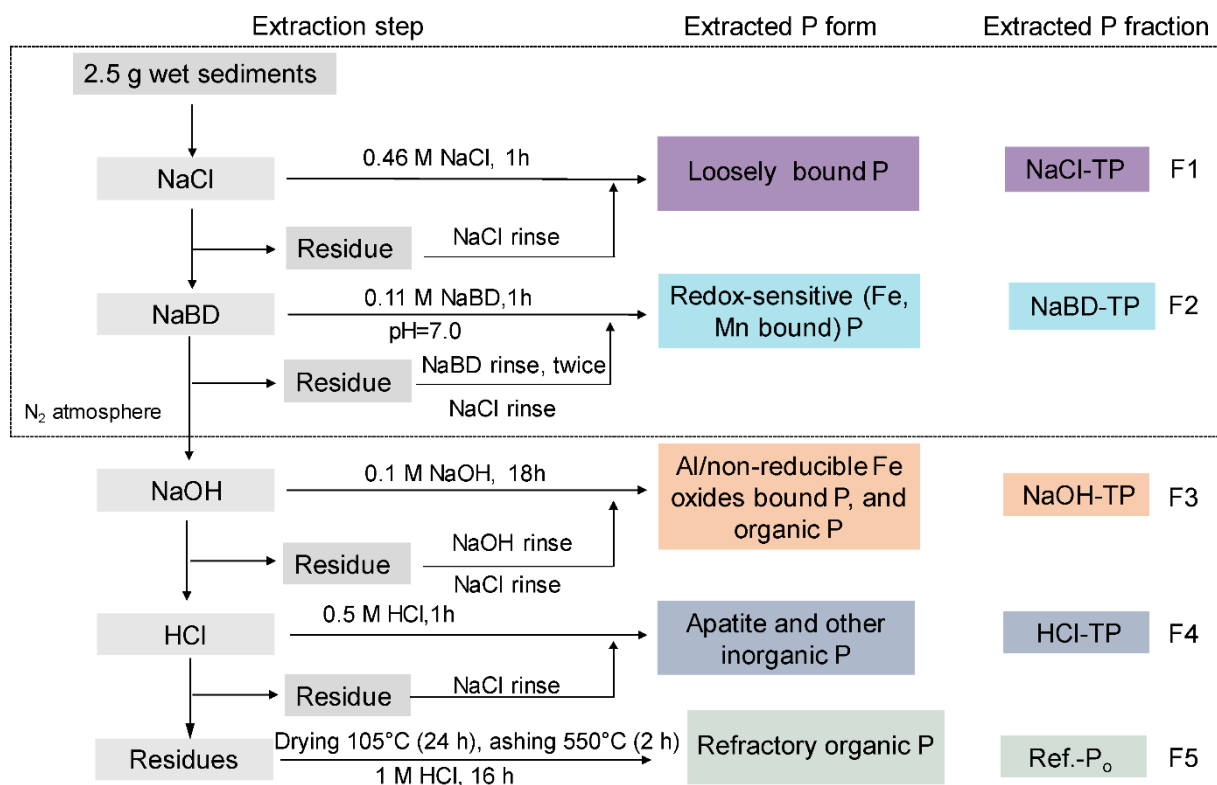

**Figure S3: Five-step sequential P extraction protocol.** The F1-F4 fractions follow the four-step extraction protocol in Tu et al., (2019), and F5 follows the last extraction step in Lukkari et al. (2007). Sodium dithionite (Na<sub>2</sub>S<sub>2</sub>O<sub>4</sub>) dissolved in 0.11 M sodium bicarbonate (NaHCO<sub>3</sub>) buffer (pH 7.0) henceforth is termed as NaBD.

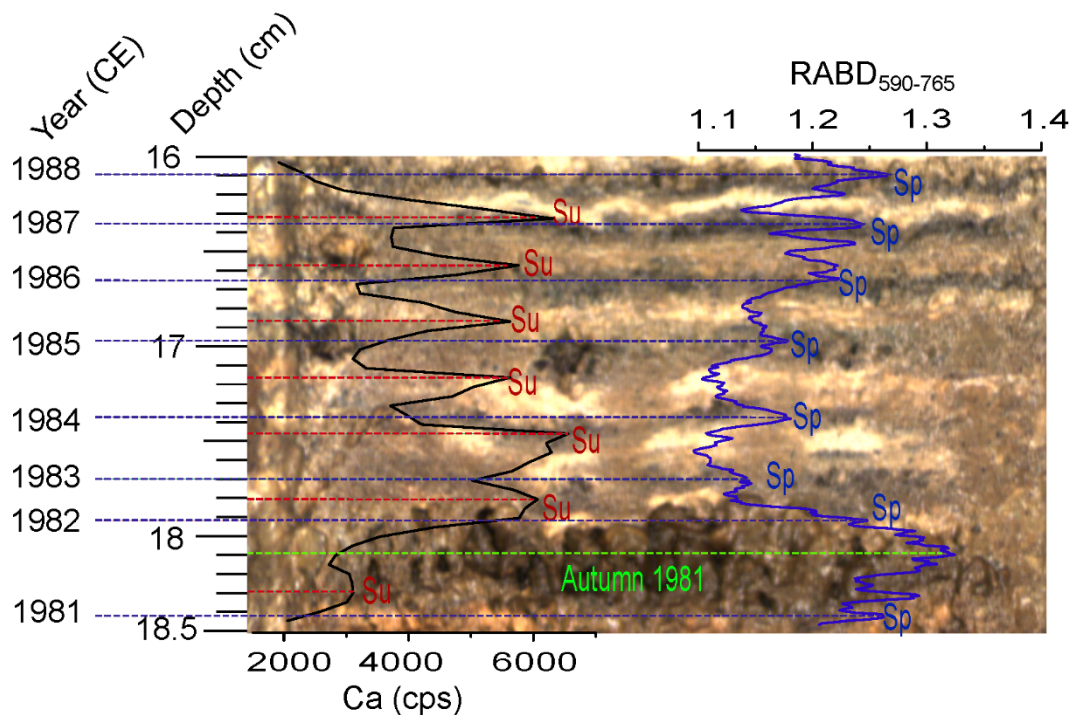

**Figure S4:** The laminations from depth 16 cm to 18.5 cm with a regular succession of light calcite layers (Ca-rich) and dark organic-rich (RABD<sub>590-765</sub> inferred green-pigments) layers indicated by different colored lines (color figure online). The background is the RGB contrast enhanced core picture (Sp: Spring; Su: Summer). The algal bloom in the autumn of 1981 year coincides with the historical record in GSA (2007).

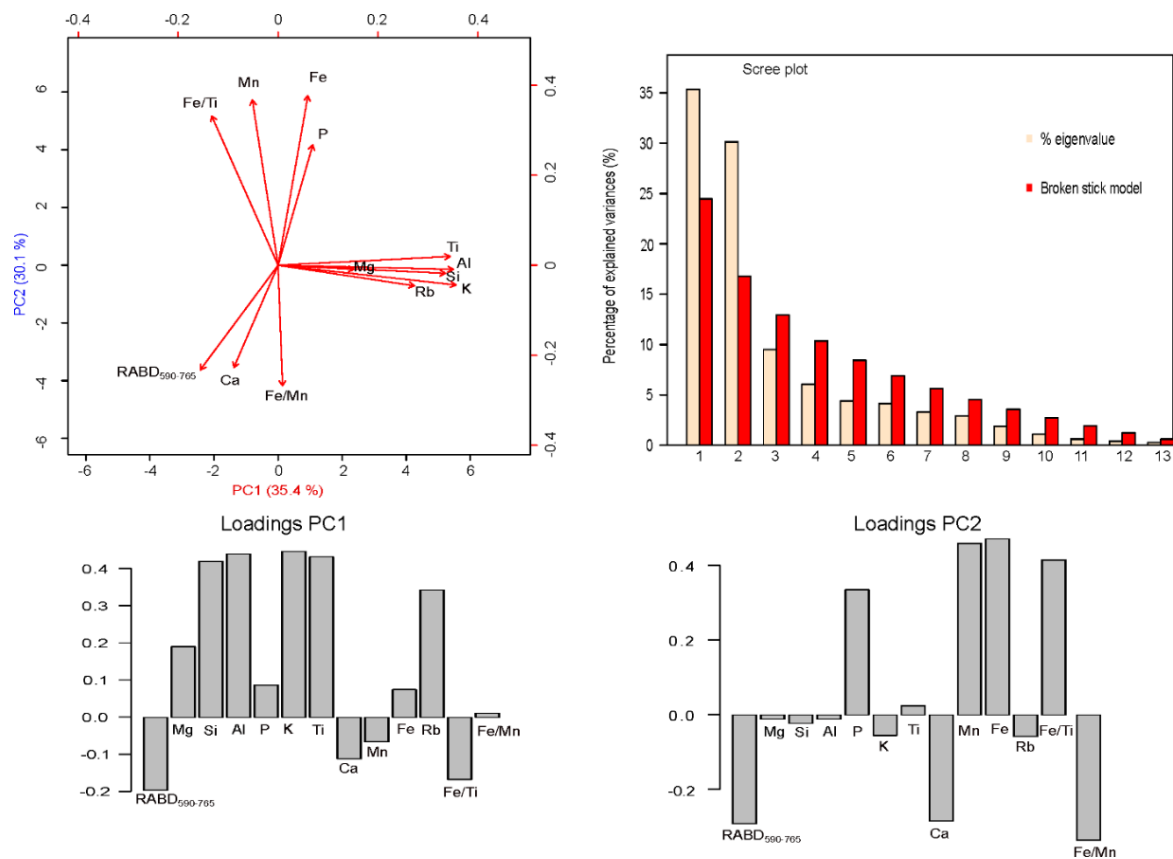

**Figure S5: The biplot on standardized data of variables from Fig. 3 and S6, the screeplot and the loadings of the PCA.**

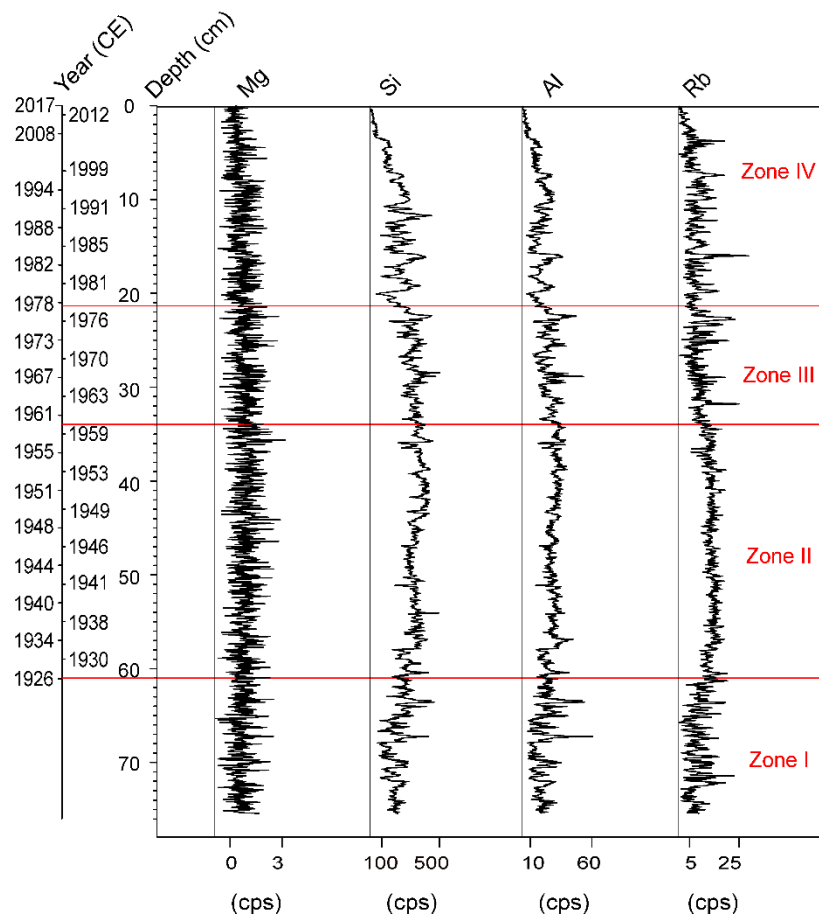

**Figure S6: Stratigraphical records of several XRF-elements in sediments of Core Burg17-B. Elemental counts are represented in cps (counts per second). The red horizontal lines separate the four significant clusters retrieved by the CONISS analysis in Fig. 3.**

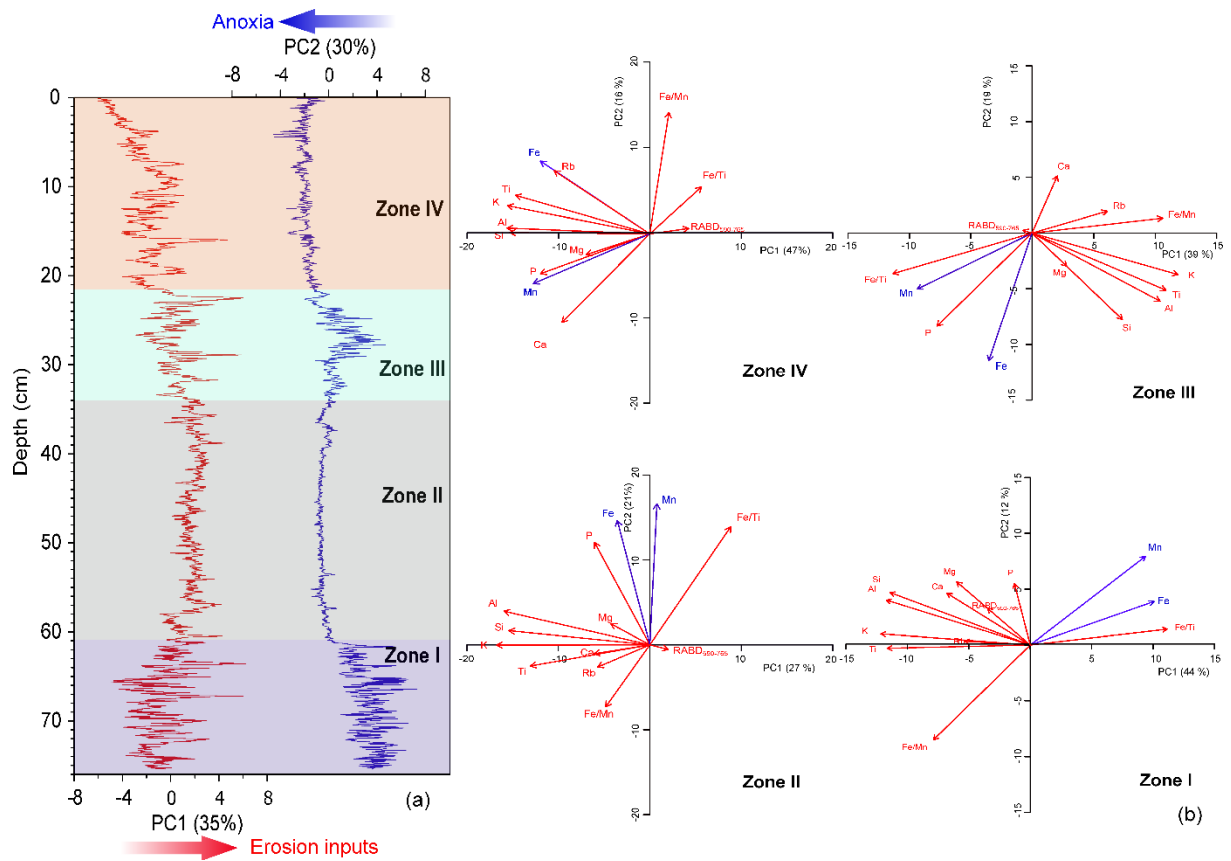

**Figure S7: Multivariate analysis of green-pigments and geochemical dataset from Fig. 3 and S6. (a) Distribution of four CONISS-zones, and PC1 and PC2 scores along with the sediment Core Burg17-B. (b) Biplots of PC1 and PC2 for individual CONISS-zones in Fig. 3.**



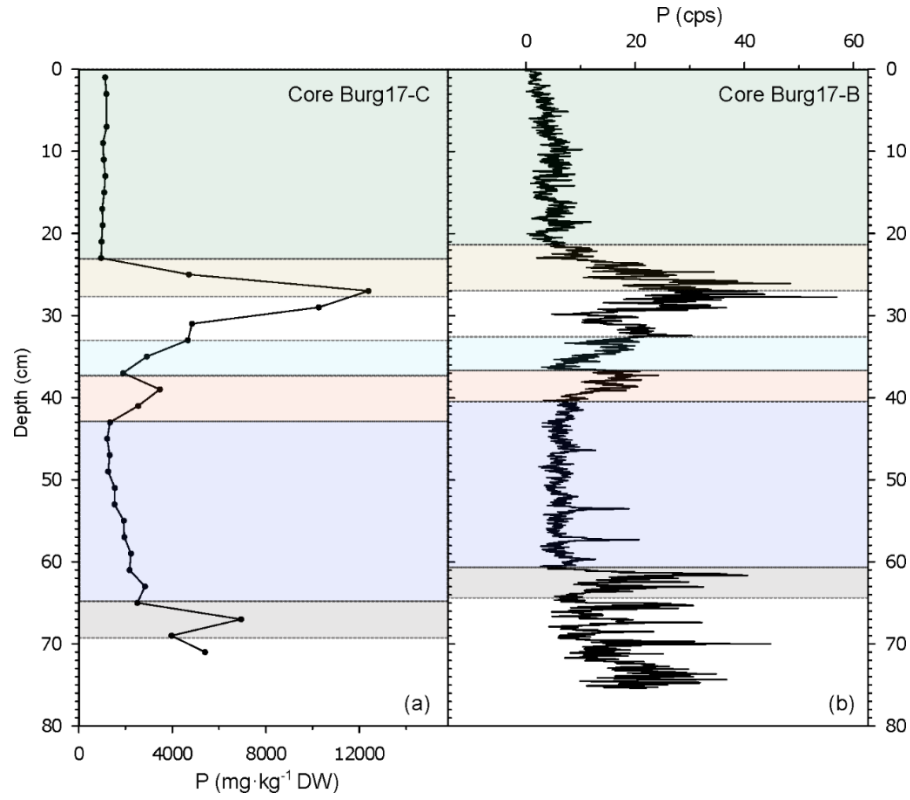

**Figure S8:** The profiles of (a) total P concentrations from sequential P extraction (Burg17-B) and (b) semi-quantitative XRF-P (Burg17-C). The colored sections indicate the matching between the two profiles.

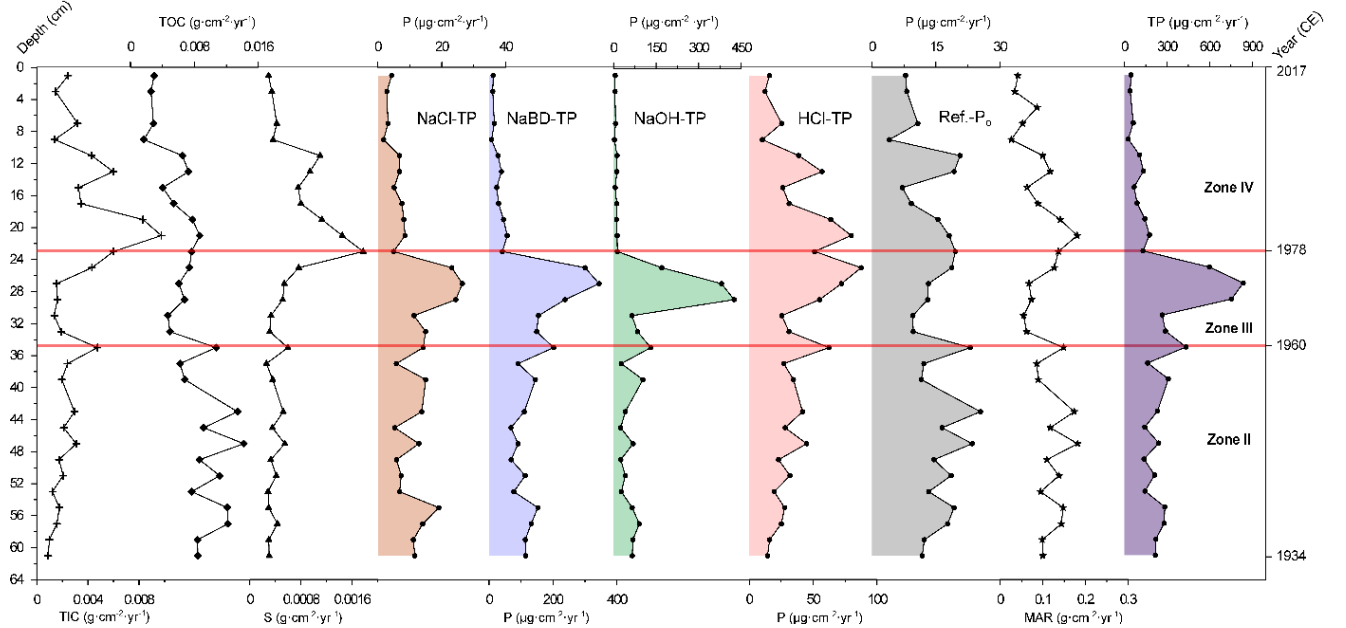

**Figure S9:** Net burial rates (NBR) of total inorganic carbon (TIC), total organic carbon (TOC), sulfur (S) contents, all the five P fractions, total P (TP) and the sediment mass accumulation rates (MAR) in sediments of Lake Burgäschli

between 1934 and 2017 CE. The horizontal red lines separate the significant CONISS zones as in Fig. 3 and Fig. 5. The y-axis (left) refers to the sediment depth of Core Burg17-C.

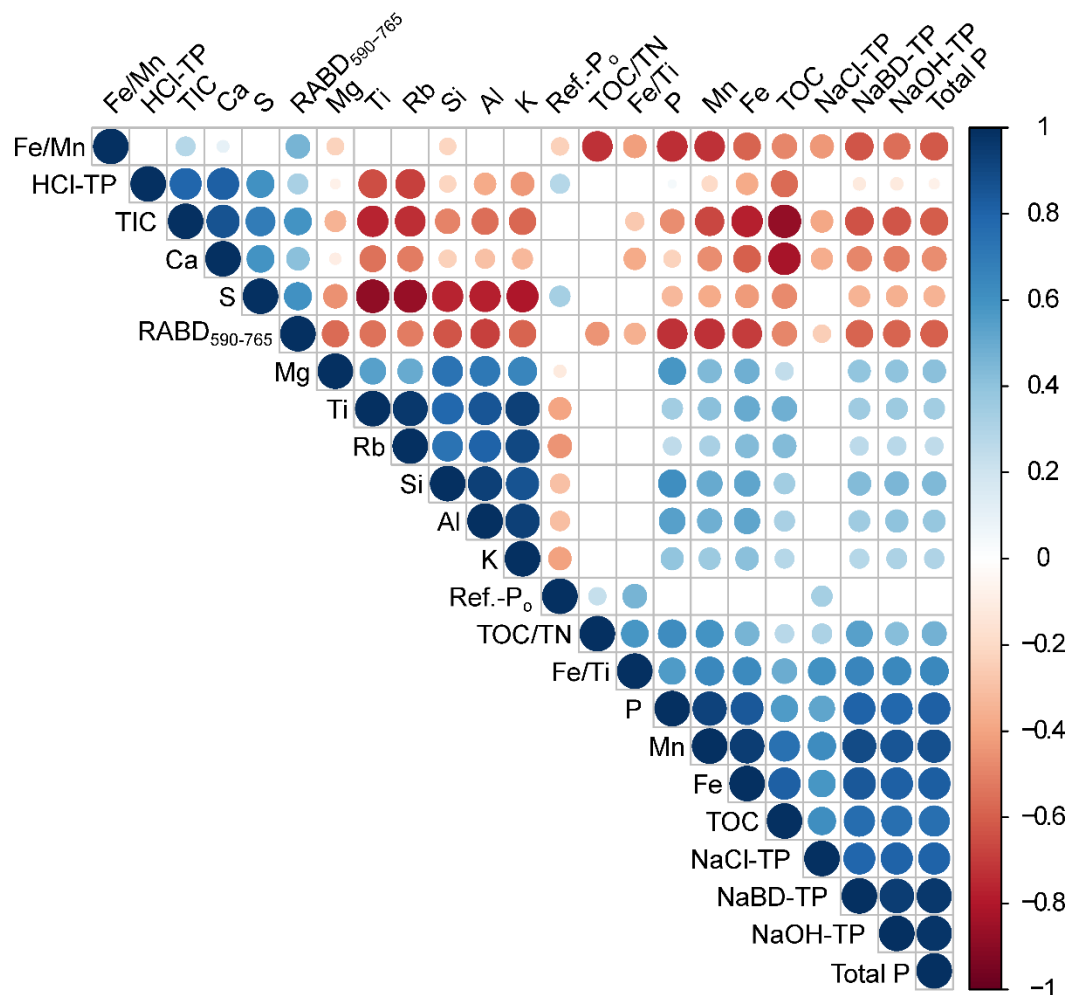

Figure S10: Spearman's rank correlation matrix of all variables (presented in Fig. 7) at the significance level of 0.05. Only the p-value of the correlation  $< 0.05$  is shown. In total 35 samples points are included. The variable-order follows the output of hierarchical clustering.

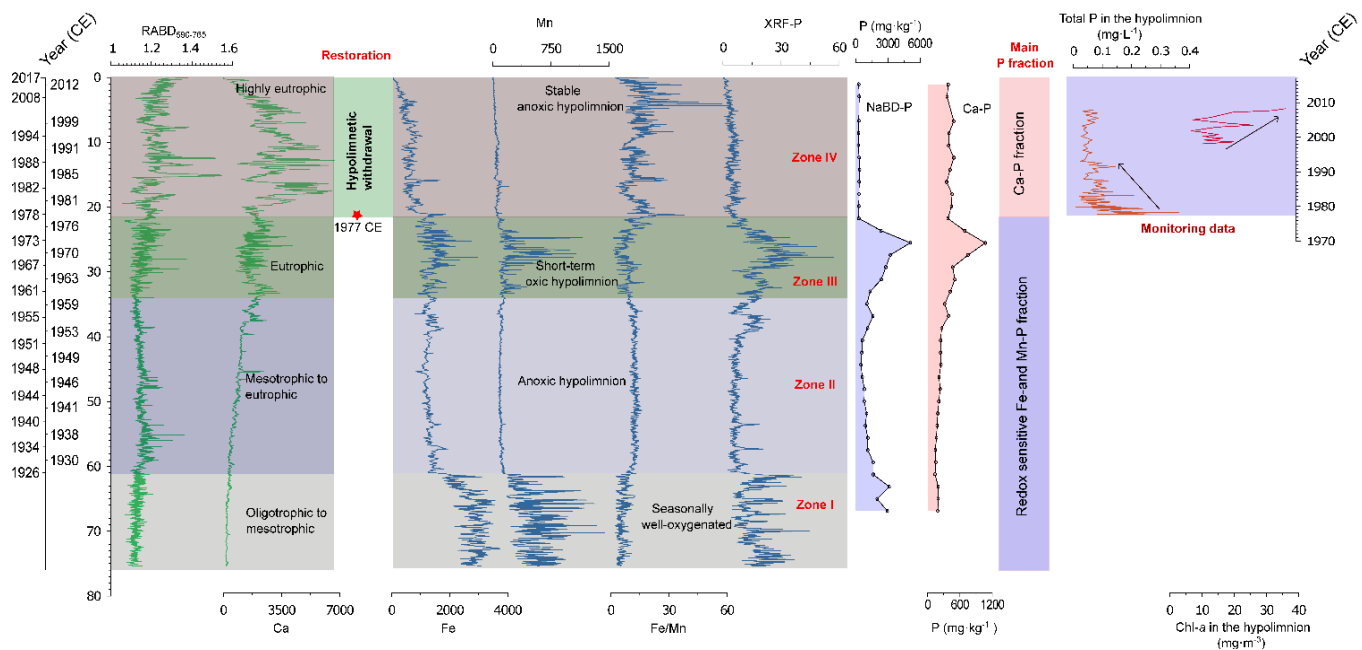

**Figure S11: The synthesis of Lake Burgäschi proxy records, showing lake trophic levels, hypolimnetic withdrawal restoration, hypolimnetic redox conditions, sedimentary P fractions (e.g. NaBD-P and Ca-P ) retention and lake monitoring data of hypolimnetic total P and Chl-*a* concentrations (GSA, 2007) between early 1900s and 2017.**

## References

- Lukkari, K., Hartikainen, H. and Leivuori, M.: Fractionation of sediment phosphorus revisited. I: Fractionation steps and their biogeochemical basis, *Limnol. Oceanogr. Meth.*, 5,433-444, <https://doi.org/10.4319/lom.2007.5.433>, 2007.
- GSA: 30 Jahre Tiefenwasser-Ableitung. Wie geht es dem Burgäschisee heute?, Office for Water Protection and Waste Management of the Canton of Bern, Bern, 2007.
- Tu, L., Jarosch, K.A., Schneider, T. and Grosjean, M.: Phosphorus fractions in sediments and their relevance for historical lake eutrophication in the Ponte Tresa basin (Lake Lugano, Switzerland) since 1959, *Sci. Total Environ.*, 685, 806-817, <https://doi.org/10.1016/j.scitotenv.2019.06.243>, 2019.
